# Supplementary material for: Multiphase interface coupling of Ni-based sulfide composites for high-current-density oxygen evolution electrocatalysis in alkaline freshwater/simulated seawater/seawater
Source: Royal Society of Chemistry journal article supplement (doi:10.1039/d4dt01673d), 2024-01-01
Supplement: d4dt01673d1.pdf [file d4dt01673d1.pdf]

## Supporting Information

**Multiphases interface coupling of Ni-based sulfides composites for  
large-current-density oxygen evolution electrocatalysis in  
alkaline freshwater/simulated seawater/seawater**

Jing Liang,<sup>a</sup> Zhifeng Zhao,<sup>\*b</sup> Zhanhua Su,<sup>b</sup> Weili Qu,<sup>a</sup> Rui Guo,<sup>a</sup> Xiaofeng Li,<sup>\*a</sup> and Yongchen Shang<sup>\*a</sup>

<sup>a</sup>College of Chemistry and Chemical Engineering, Harbin Normal University, Harbin, 150025,  
China

<sup>b</sup>College of Chemistry, Guangdong University of Petrochemical Technology, Maoming, 525000,  
China

## **Experimental section**

### **1. Materials and Characterizations**

Pattern X-ray diffraction (XRD) was recorded using a Bruker D8 equipped with Cu-K $\alpha$  radiation. X-ray photoelectron spectroscopy (XPS) analysis was performed using a VG ESCALAB MK II spectrophotometer with Mg-K $\alpha$  radiation (1253.6 eV). Scanning electron microscopy (SEM) test was carried out on a Hitachi S-4800 instrument at an accelerating voltage of 5kV. The high-resolution transmission electron microscopy (HRTEM) and selected area electron diffraction (SAED) patterns were performed on a FEI Talos-F200S electron microscope. The compositions of the products were examined using energy dispersive X-ray spectroscopy (EDX) attached to the EM system. Specific surface areas and pore size were measured using Brunauer-Emmett-Teller (BET). Atomic Force Microscope (AFM, BioScope Resolve, Bruker, USA) was also utilized to characterize the morphology of NNSN/NF sample using ScanAsyst-Air probe (Bruker). The optical absorption studies of the synthesized sample were analysed with the absorption spectra using UV–Vis-NIR spectrophotometer (Shimadzu). The contact angles were measured using Contact Angle/surface tension measuring instrument (Dataphysics OCA20).

### **2. Preparation of NNSN/NF-xh (x=8, 11 and 14)**

Sonicate NF (1×3 cm<sup>2</sup>) in 3M HCl solution for 30 min to remove the NiO layer on the surface of the NF. It is then sonicated three times with deionized water and ethanol to remove residual HCl and organic impurities on the surface of NF, and then dried in an oven at 60°C.

6.63 mmol CH<sub>4</sub>N<sub>2</sub>S and 0.26 mmol Ni(NO<sub>3</sub>)<sub>2</sub>·6H<sub>2</sub>O were accurately weighed and dissolved in 25 mL of CH<sub>3</sub>CH<sub>2</sub>OH and then magnetically stirred for 20 min to form a clarified and homogeneous solution, and then NF was put into the solution, and the solution was transferred into a 50 mL PTFE-lined stainless steel reactor with a piece of NF in it. The reaction was kept at 160 °C for 8 h, 11 h and 14 h, respectively. The as-obtained materials were washed with DI water and ethanol repeatedly and then dried at 60 °C for 12 h to obtain the NNSN/NF-xh (x=8, 11 and 14) samples.

### **3. Electrochemical measurements**

Electrochemical tests were performed on the CHI760e workstation, using a typical three-electrode system, Ag/AgCl as the reference electrode, graphite rod as the counter electrode, and the NNSN/NF as the working electrode. All potentials are expressed with reference to a reversible hydrogen electrode (RHE) by the Nernst equation:  $E_{\text{RHE}} = E_{\text{Ag/AgCl}} + 0.059 \text{ pH} + 0.197$ . The electrolytes are 1M KOH, 1M KOH+0.5M NaCl and 1M KOH + seawater, and its pH is 14. All linear sweep

voltammetry (LSV) curves are 95% iR corrected and the sweep rate is 5 mV s<sup>-1</sup>. The Tafel data were fitted according to the equation  $\eta = b \log(j) + \alpha$  (j: current density, and b: Tafel slope). The durability tests were carried out by repeating the potential at a scan rate of 50 mV s<sup>-1</sup> for 3000 cycles. The i-t test was carried out at a constant potential to surveil the variation of the current density during the long-term OER process. CV measurements of the electrocatalysts were performed in a potential range of 0.94–1.04V (vs. RHE) at scan speeds of 10-50 mV s<sup>-1</sup> to calculate the double-layer capacitance (C<sub>dl</sub>) of the catalysts. ECSA was evaluated by measuring C<sub>dl</sub> of CV at non-Faradaic potential. EIS is measured in the frequency range of 0.1 Hz-100 kHz and the voltage is 0.5 V.

## Section 2 Supplementary Structural Section

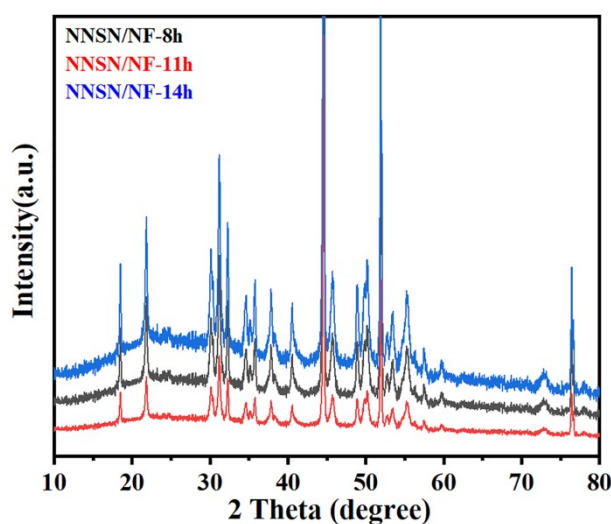

**Fig. S1** XRD patterns of NNSN/NF-xh (x=8, 11 and 14)

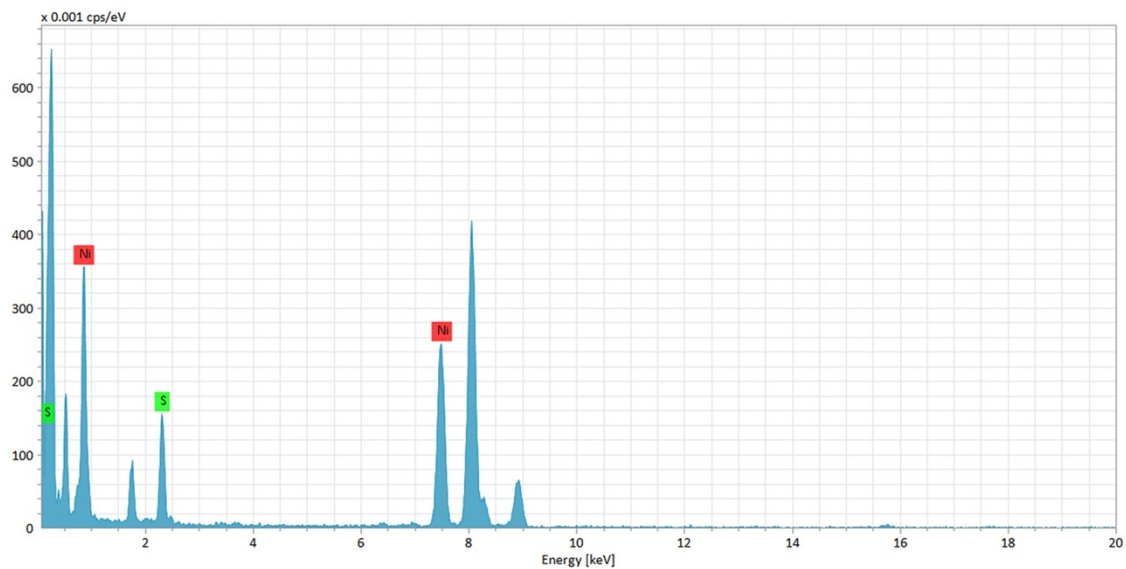

Fig. S2 EDX patterns of NNSN/NF-11h

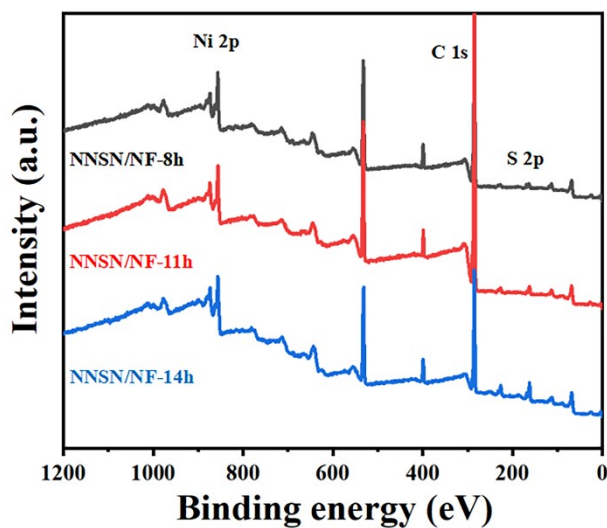

Fig. S3 XPS spectrum of NNSN/NF-8,11 and 14h

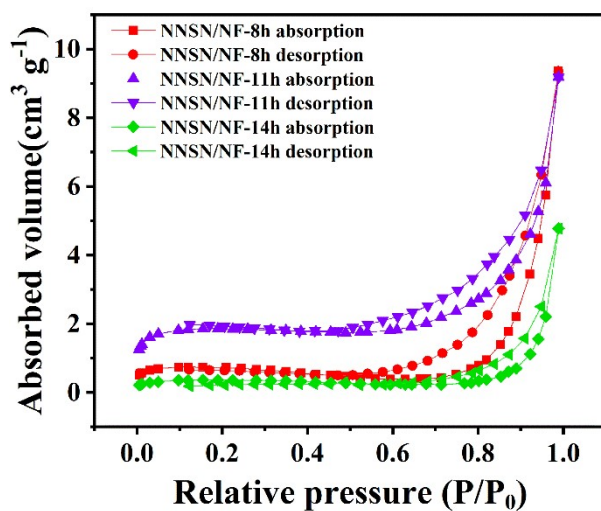

Fig. S4 N<sub>2</sub> adsorption–desorption isotherms of NNSN/NF-xh (x=8,11 and 14).

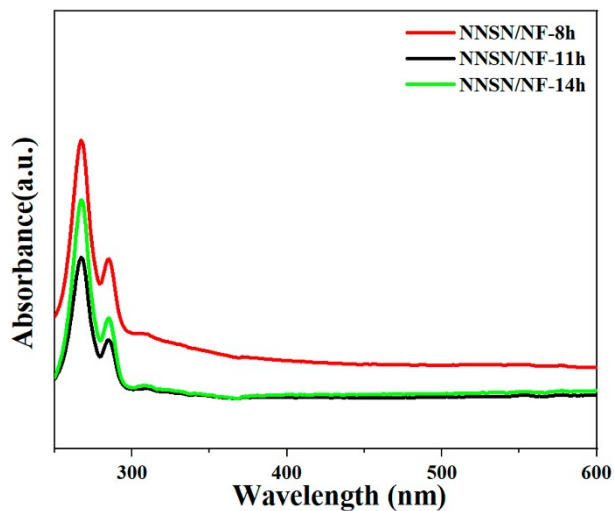

Fig. S5 The UV-visible absorption spectra of NNSN/NF-xh (8,11 and 14).

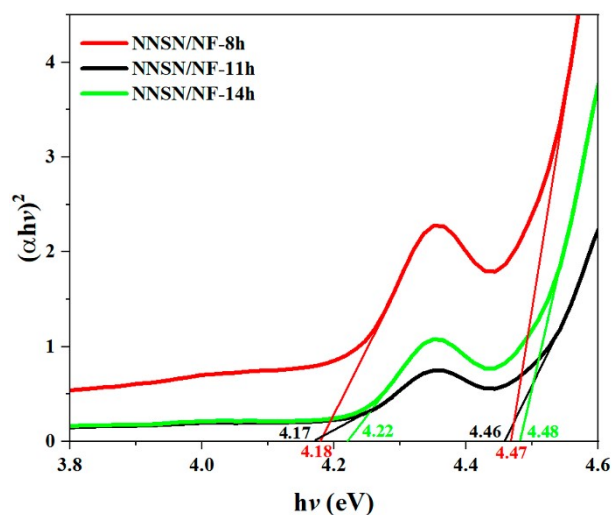

Fig.S6 The corresponding curves of  $(\alpha h\nu)^2$  versus  $h\nu$  of NNSN/NF-xh (x=8,11 and 14) samples.

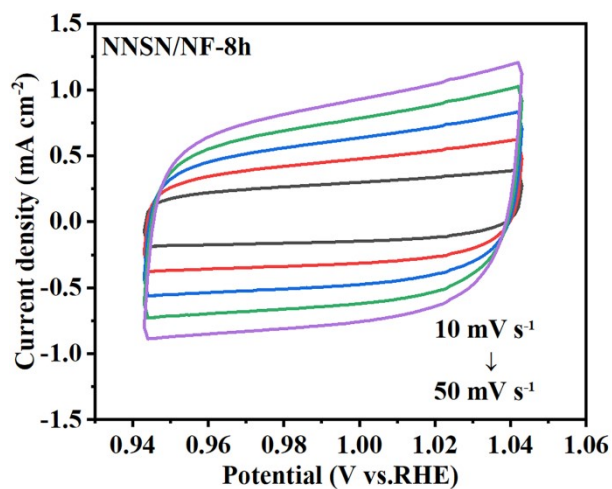

Fig. S7  $C_{dl}$  plots of NNSN/NF-8h

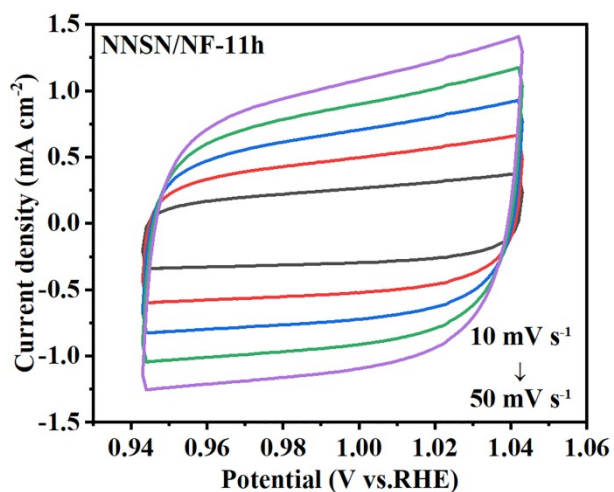

**Fig. S8**  $C_{dl}$  plots of NNSN/NF-11h

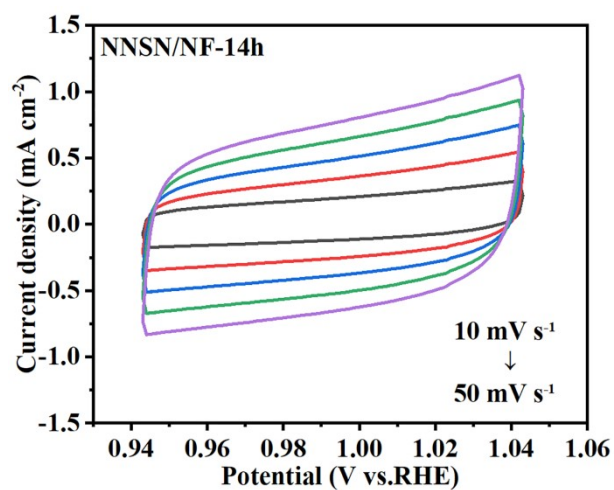

**Fig. S9**  $C_{dl}$  plots of NNSN/NF-14h

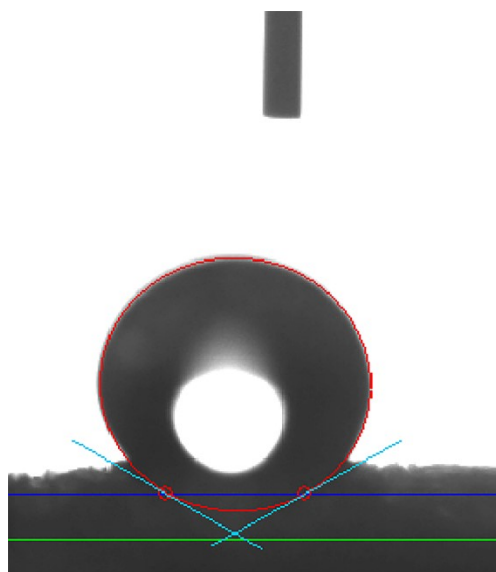

**Fig. S10** Digital images of the wetting process of 1M KOH droplet at the NF.

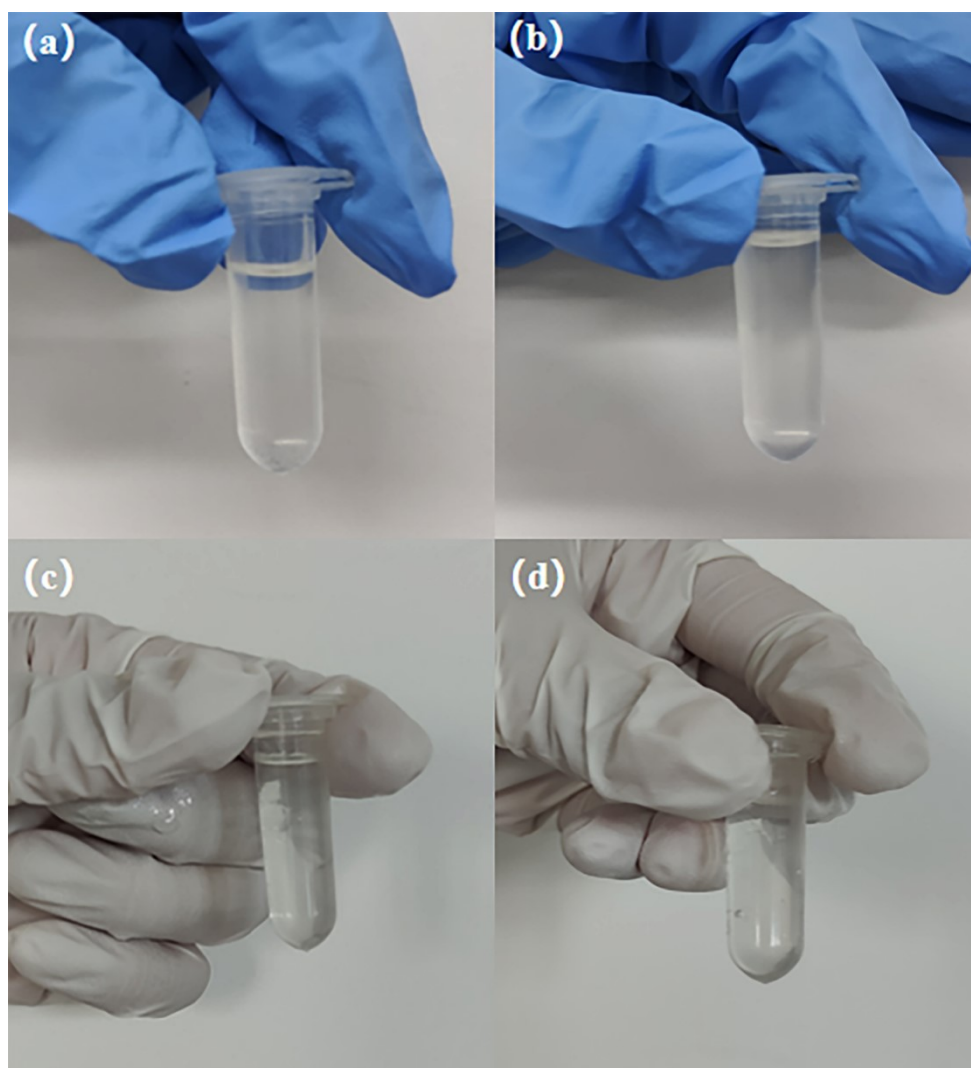

**Fig. S11** (a and c) the 1.0 M KOH + 0.5 M NaCl and 1.0 M KOH +seawater electrolyte after 3000 CV cycles. (b and d) the 1.0 M KOH + 0.5 M NaCl and 1.0 M KOH +seawater electrolyte after 3000 CV cycles with the addition of KI.



**Table S1.** Comparison of OER performance of similar catalysts in 1.0 M KOH solution.

| Catalyst                                                             | Electrolyte | j [mA cm <sup>-2</sup> ] | $\eta$ [mV] | Tafel [mV dec <sup>-1</sup> ] | Ref.      |
|----------------------------------------------------------------------|-------------|--------------------------|-------------|-------------------------------|-----------|
| FeOOH/Co <sub>9</sub> S <sub>8</sub> /Ni <sub>3</sub> S <sub>2</sub> | 1.0 M KOH   | 1000                     | 265         | 32                            | S1        |
| NiFeS/NF                                                             | 1.0 M KOH   | 500                      | 272         | 56.37                         | S2        |
| NiCo@C–NiCoMoO/NF                                                    | 1.0 M KOH   | 1000                     | 390         | 75.15                         | S3        |
| Fe–NiS/NF                                                            | 1.0 M KOH   | 500                      | 222         | 41.7                          | S4        |
| S–(Ni,Fe)OOH/NF                                                      | 1.0 M KOH   | 1000                     | 355         | 48.9                          | S5        |
| Ni@C–MoO <sub>2</sub> /NF                                            | 1.0 M KOH   | 1000                     | 400         | 52.34                         | S6        |
| FeCoNiMnOOH/NF                                                       | 1.0 M KOH   | 500                      | 378         | 62.1                          | S7        |
| V–Ni <sub>3</sub> Se <sub>2</sub> /NF                                | 1.0 M KOH   | 500                      | 370         | 62                            | S8        |
| Ni–Fe–OH@Ni <sub>3</sub> S <sub>2</sub> /NF                          | 1.0 M KOH   | 500                      | 530         | 93                            | S9        |
| Fe–NiMoSe@C                                                          | 1.0 M KOH   | 1000                     | 446         | 34.38                         | S10       |
| NNSN/NF                                                              | 1.0 M KOH   | 1000                     | 377         | 45.93                         | This work |

**Table S2.** Comparison of OER performance of similar catalysts in 1.0 M KOH+0.5 M NaCl solution.

| Catalyst                                                   | Electrolyte            | j [mA cm <sup>-2</sup> ] | $\eta$ [mV] | Tafel [mV dec <sup>-1</sup> ] | Ref.      |
|------------------------------------------------------------|------------------------|--------------------------|-------------|-------------------------------|-----------|
| NiFeS/NF                                                   | 1.0 M KOH + 0.5 M NaCl | 500                      | 288         | ---                           | S2        |
| NiCoS/NF                                                   | 1.0 M KOH + 0.5 M NaCl | 1000                     | 430         | ---                           | S11       |
| NiCoHPi@Ni <sub>3</sub> N/NF                               | 1.0 M KOH + 0.5 M NaCl | 500                      | 425         | ---                           | S12       |
| R–NiCo(OH)F                                                | 1.0 M KOH + 0.5 M NaCl | 1000                     | 550         | ---                           | S13       |
| MOEE                                                       | 30% KOH + 0.5 M NaCl   | 1000                     | 470         | ---                           | S14       |
| NiFe hydroxide/NiS <sub>x</sub> –Ni                        | 1.0 M KOH + 0.5 M NaCl | 400                      | 510         | ---                           | S15       |
| Fe–Ni(OH) <sub>2</sub> /Ni <sub>3</sub> S <sub>2</sub> @NF | 1.0 M KOH + 0.5 M NaCl | 10                       | 269         | 46                            | S16       |
| Fe <sub>x</sub> –Ni <sub>3</sub> S <sub>2</sub> /NF        | 1.0 M KOH + 0.5 M NaCl | 100                      | 306         | 80                            | S17       |
| Ni(OH) <sub>2</sub> @NiFe–PBA                              | 1.0 M KOH + 0.5 M NaCl | 100                      | 342         | 57.1                          | S18       |
| NNSN/NF                                                    | 1.0 M KOH + 0.5 M NaCl | 1000                     | 377         | 45.93                         | This work |

**Table S3.** Comparison of OER performance of similar catalysts in 1.0 M KOH+ seawater.

| Catalyst                     | Electrolyte          | j [mA cm <sup>-2</sup> ] | η [mV] | Tafel [mV dec <sup>-1</sup> ] | Ref.      |
|------------------------------|----------------------|--------------------------|--------|-------------------------------|-----------|
| S-(Ni,Fe)OOH/NF              | 1.0 M KOH + seawater | 1000                     | 462    | ---                           | S5        |
| NiCoS/NF                     | 1.0 M KOH + seawater | 1000                     | 470    | ---                           | S11       |
| NiFe LDH-CeW@NFF             | 1.0 M KOH + seawater | 500                      | 330    | 81.2                          | S19       |
| Ru-Ni(Fe)P <sub>2</sub> /NF  | 1.0 M KOH + seawater | 1000                     | 520    | ---                           | S20       |
| BZ-NiFe-LDH/CC               | 1.0 M KOH + seawater | 500                      | 610    | ---                           | S21       |
| NiMoN/NiFeN                  | 1.0 M KOH + seawater | 100                      | 307    | ---                           | S22       |
| S-NiFeSe <sub>2</sub>        | 1.0 M KOH + seawater | 100                      | 367    | 32                            | S23       |
| Ni(OH) <sub>2</sub> -TCNQ/GP | 1.0 M KOH + seawater | 100                      | 382    | 75                            | S24       |
| NNSN/NF                      | 1.0 M KOH + seawater | 1000                     | 476    | 54.66                         | This work |

**Table S4.** Comparison of OER performance of similar catalysts in 1.0 M KOH solution.

| Catalyst         | Electrolyte          | j [mA cm <sup>-2</sup> ] | η [mV] | Tafel [mV dec <sup>-1</sup> ] | Ref.      |
|------------------|----------------------|--------------------------|--------|-------------------------------|-----------|
| RuO <sub>2</sub> | 1.0 M KOH            | 500                      | 495    | 98.01                         | S2        |
| RuO <sub>2</sub> | 1.0 M KOH            | 100                      | 377    | 67.4                          | S25       |
| RuO <sub>2</sub> | 1.0 M KOH + seawater | 10                       | 620    | ---                           | S26       |
| IrO <sub>2</sub> | 1.0 M KOH + seawater | 500                      | 763    | 132                           | S27       |
| NNSN/NF-11h      | 1.0 M KOH            | 1000                     | 377    | 45.93                         | This work |
| NNSN/NF-11h      | 1.0 M KOH + seawater | 1000                     | 476    | 54.66                         | This work |

### Supplementary References

S1. Y. Y. Qian, B. H. Zhou, Q. Zhang and H. M. Yang, *J. Phys. Chem. Lett.*, 2023, **14**, 6709–6718.

S2. J. Chen, L. C. Zhang, J. Li, X. He, Y. Y. Zheng, S. J. Sun, X. D. Fang, D. D. Zheng, Y. S. Luo, Y. Wang, J. Zhang, L. S. Xie, Z. W. Cai, Y. T. Sun, A. A. Alshehri, Q. Q. Kong, C. W. Tang and X. P. Sun, *J. Mater. Chem. A*, 2023, **11**, 1116.

S3. G. F. Qian, J. L. Chen, T. Q. Yu, L. Luo and S. B. Yin, *Nano-Micro Lett.*, 2021, **13**, 77.

- S4. C. X. Yang, K. Dong, L. C. Zhang, X. He, J. Chen, S. J. Sun, M. Yue, H. Zhang, M. Zhang, D. D. Zheng, Y. S. Luo, B. W. Ying, Q. Liu, A. M. Asiri, M. S. Hamdy and X. P. Sun, *Inorg. Chem.*, 2023, **62**, 7976–7981.
- S5. L. Yu, L. B. Wu, B. McElhenny, S. W. Song, D. Luo, D. F. H. Zhang, Y. Yu, S. Chen and Z. F. Ren, *Energ. Environ.Sci.*, 2020, **13**, 3439–3446.
- S6. G. F. Qian, G. T. Yu, J. J. Lu, L. Luo, T. Wang, C. H. Zhang, R. Q. Ku, S. B. Yin, W. Chen and S. C. Mu, *J. Mater. Chem. A*, 2020, **8**, 14545.
- S7. L. X. He, N. Wang, B. L. Sun, L. Zhong, M. Q. Yao, W. C. Hu and S. Komarneni, *J. Clean Prod.*, 2022, **356**, 131680.
- S8. D. Y. He, L. Y. Cao, J. F. Huang, Y. Q. Feng, G. D. Li, D. Yang, Q. Q. Huan and L. L. Feng, *ACS Sustain. Chem. Eng.*, 2021, **9**, 12005–12016.
- S9. X. Zou, Y. P. Liu, G. D. Li, Y. Y. Wu, D. P. Liu, W. Li, H. W. Li, D. J. Wang, Y. Zhang and X. X. Zou, *Adv. Mater.*, 2017, **29**, 1700404.
- S10. X. C. Xu, S. Z. Zhang, Q. H. Zhang, S. J. Chen, Y. X. Wu and Z. P. Sun, *ACS Sustain. Chem. Eng.*, 2023, **11**, 15338–15349.
- S11. C. Z. Wang, M. Z. Zhu, Z. Y. Cao, P. Zhu, Y. Q. Cao, X. Y. Xu, C. X. Xu and Z. Y. Yin, *Appl. Catal. B-Environ.*, 2021, **291**, 120071.
- S12. H. Sun, J. K. Sun, Y. Y. Song, Y. F. Zhang, Y. Qiu, M. X. Sun, X. Y. Tian, C. Y. Li, Z. Lv and L. X. Zhang, *ACS Appl. Mater. Inter.*, 2022, **14**, 22061–22070.
- S13. F. T. Luo, P. Yu, J. T. Xiang, J. J. Jiang and S. J. Chen, *J. Energy. Chem.*, 2024, **94**, 508–516.
- S14. J. H. Li, Y. P. Liu, H. Chen, Z. K. Zhang and X. X. Zou, *Adv. Funct. Mater.*, 2021, **31**, 2101820.
- S15. Y. Kuang, M. J. Kenney, Y. T. Meng and H. J. Dai, *Proc. Natl. Acad. Sci.*, 2019, **116**, 6624–6629.
- S16. B. H. Cui, Z. Hu, C. Liu, S. Liu, F. Chen, S. Hu, J. Zhang, W. Zhou, Y. Deng, Z. Qin, Z. Wu, Y. Chen, L. Cui and W. Hu, *Nano Res.*, 2021, **14**, 1149–1155.
- S17. Y. J. Bao, Z. Y. Wu, B. B. Liu, K. X. Zhong, M. L. Guo, J. C. Tu, B. R. Wang and X. Y. Lai, *ACS Appl. Nano Mater.*, 2023, **6**, 4360–4369.
- S18. K. Chen, J. J. Qian, W. Xu and T. T. Li, *Inorg. Chem.*, 2024, **63**, 642–652.

- S19. M. Z. Li, H. J. Niu, Y. L. Li, J. W. Liu, X. Y. Yang, Y. Z. Lv, K. P. Chen and W. Zhou, *Appl. Catal. B-Environ.*, 2023, **330**, 122612.
- S20. D. L. Wu, B. Liu, R. D. Li, D. Chen, W. H. Zeng, H. Y. Zhao, Y. T. Yao, R. Qin, J. Yu, L. Chen, J. N. Zhang, B. Li and S. C. Mu, *Small*, 2023, **19**, 2300030.
- S21. L. C. Zhang, J. Liang, L. C. Yue, K. Dong, J. Li, D. L. Zhao, Z. Li, S. J. Sun, Y. S. Luo, Q. Liu, G. W. Cui, A. A. Alshehri, X. D. Guo and X. P. Sun, *Nano Res. Energy*, 2022, **1**, 9120028.
- S22. L. Yu, Q. Zhu, S. W. Song, B. McElhenny, D. Z. Wang, C. Z. Wu, Z. J. Qin, J. M. Bao, Y. Yu, S. Chen and Z. F. Ren, *Nat. Commun.*, 2019, **10**, 5106.
- S23. X. W. Chen, Y. H. Yu, X. Q. Han, H. Wang, Y. J. Hua, D. X. Wu, P. L. Deng, J. X. Xiao, X. L. Tian and J. Li, *Sci. China chem.*, 2024, **67**, <https://doi.org/10.1007/s11426-023-1965-y>
- S24. L. C. Zhang, J. Q. Wang, P. Y. Liu, J. Liang, Y. S. Luo, G. W. Cui, B. Tang, Q. Liu, X. D. Yan, H. G. Hao, M. L. Liu, R. Gao and X. P. Sun, *Nano Res.*, 2022, **15**, 6084–6090.
- S25. Zhao, G. C. Xu, J. H. Jiang, Y. W. Li, D. D. Chen and Li Zhang, *Inorg. Chem.* 2023, **62**, 16503–16512.
- S26. A. Gupta, H. K. Sadhanala and Aharon Gedanken, *Electrochim. Acta*, 2023, **470**, 143269.
- S27. H. H. You, D. S. Wu, D. H. Si, M. N. Cao, F. F. Sun, H. Zhang, H. M. Wang, T. F. Liu and R. Cao, *J. Am. Chem. Soc.* 2022, **144**, 9254–9263.
